# Supplementary figures and images for: Comparison of efficacy and safety between gonioscopy-assisted transluminal trabeculotomy and trabeculectomy for primary open-angle glaucoma treatment: a retrospective cohort study
Source: PubMed Central journal article supplement — BMC Ophthalmol. 2024 Dec 20;24:533. doi: 10.1186/s12886-024-03798-8 (PMC11660675; doi:10.1186/s12886-024-03798-8), 2024-12-20

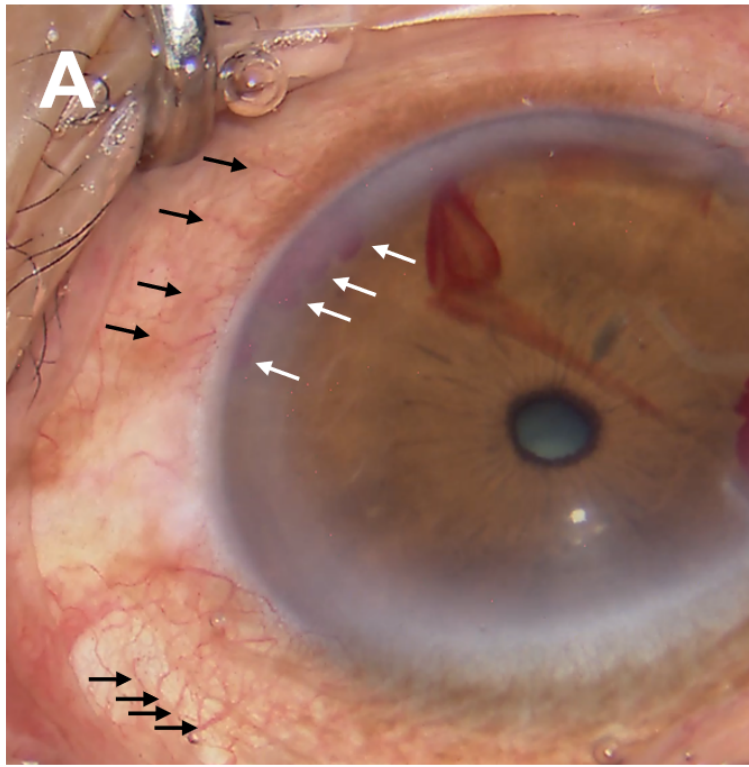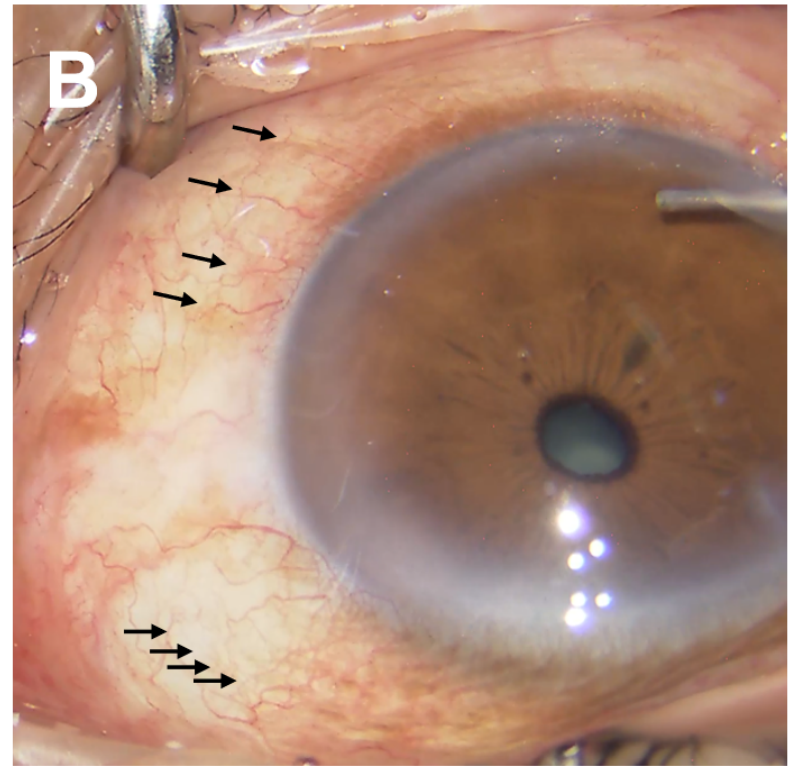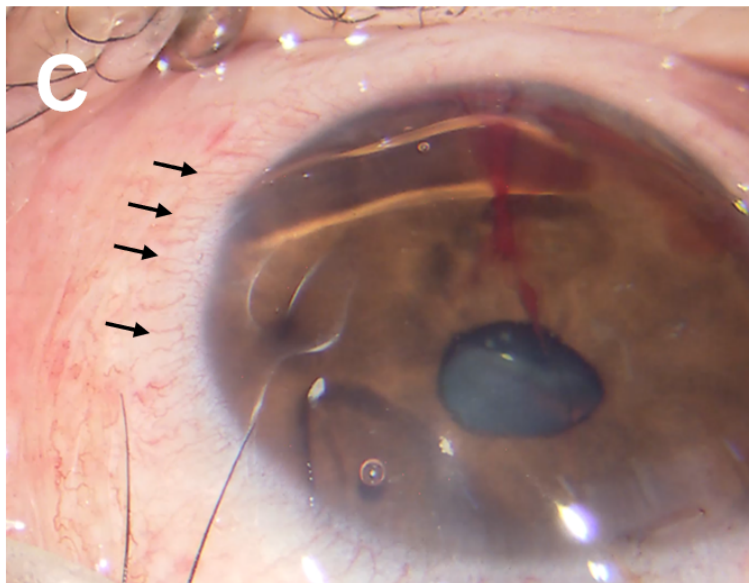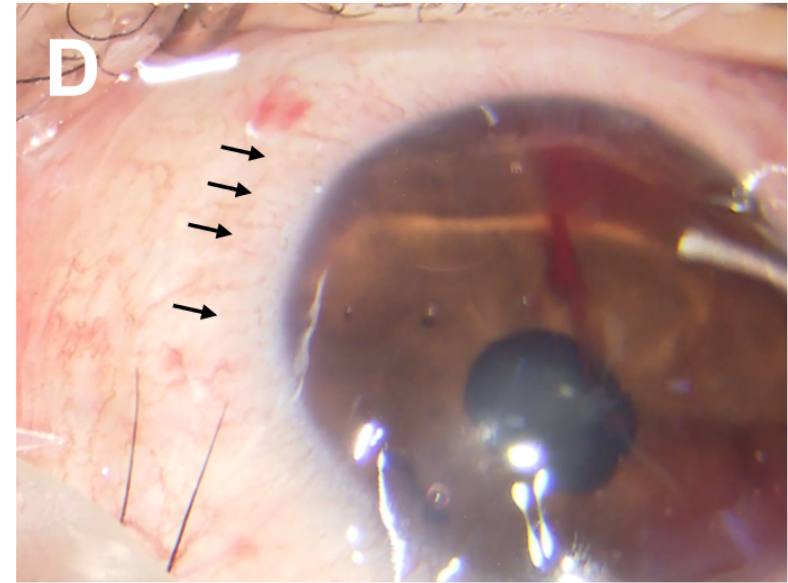

Supplement: 12886_2024_3798_MOESM1_ESM.pdf [file 12886_2024_3798_MOESM1_ESM.pdf]

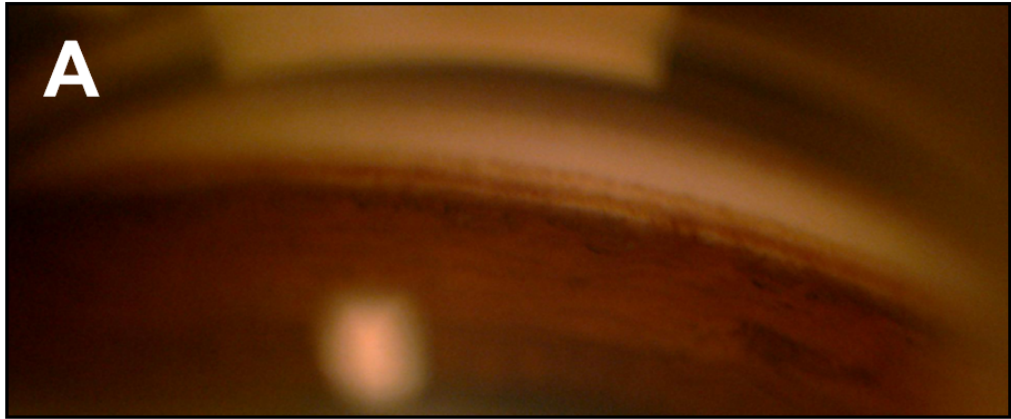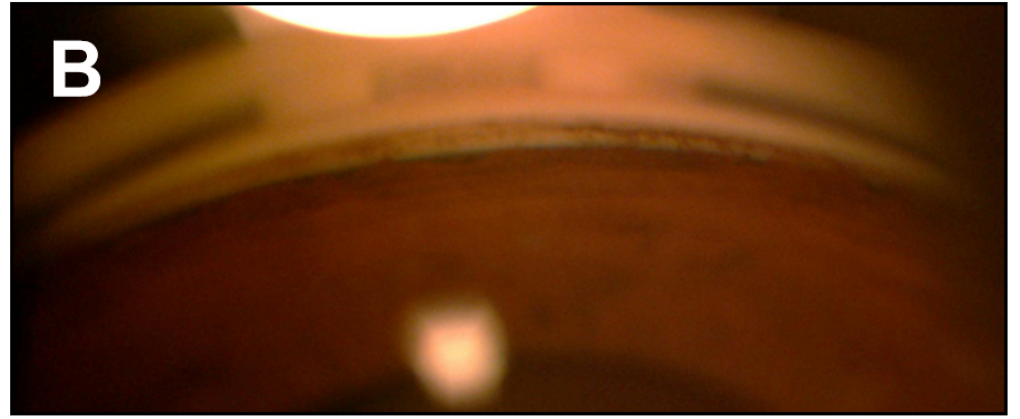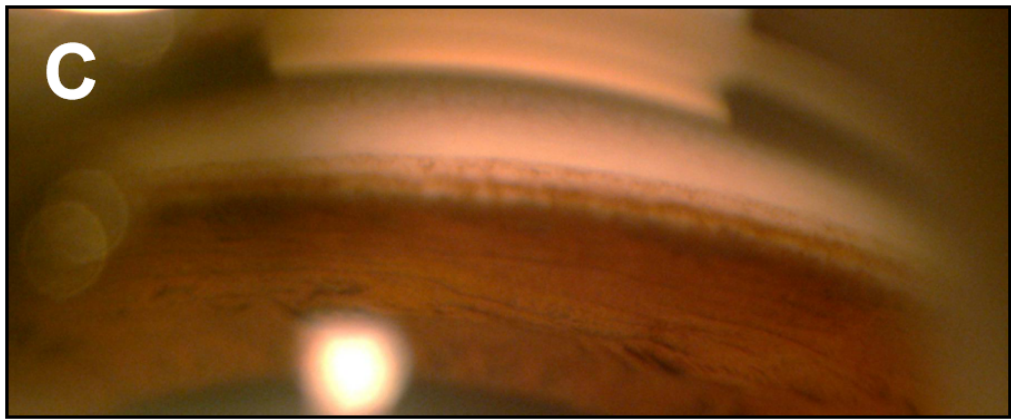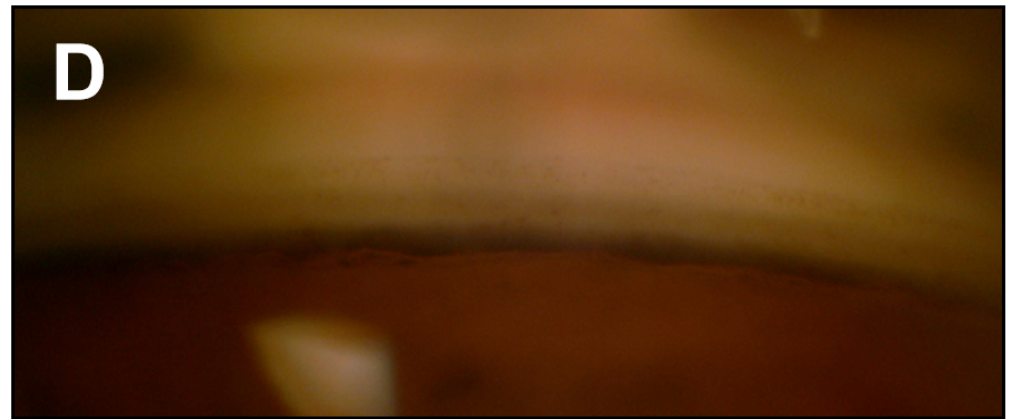

Supplement: 12886_2024_3798_MOESM3_ESM.pdf [file 12886_2024_3798_MOESM3_ESM.pdf]

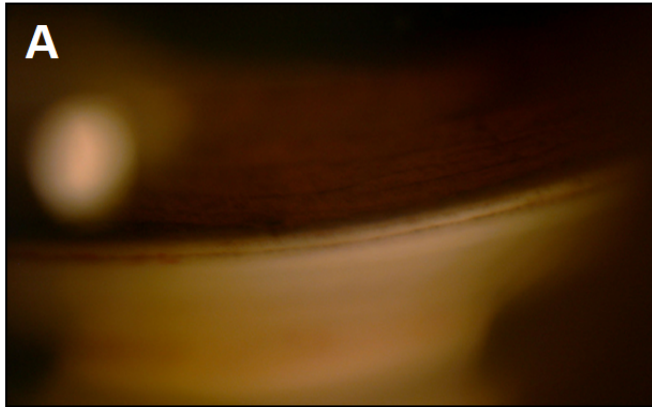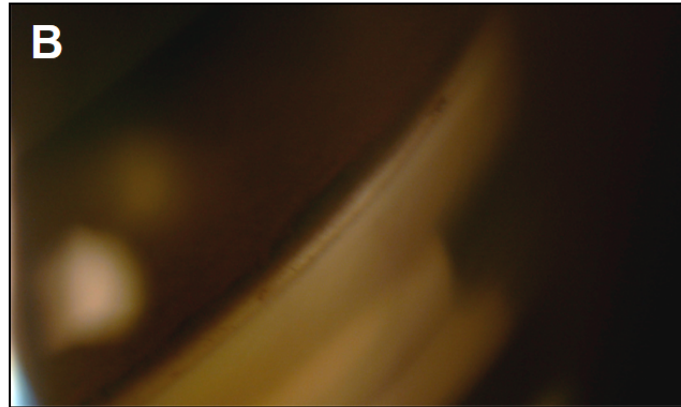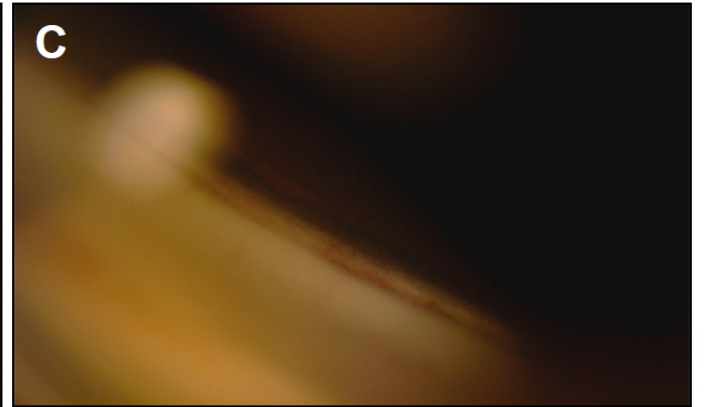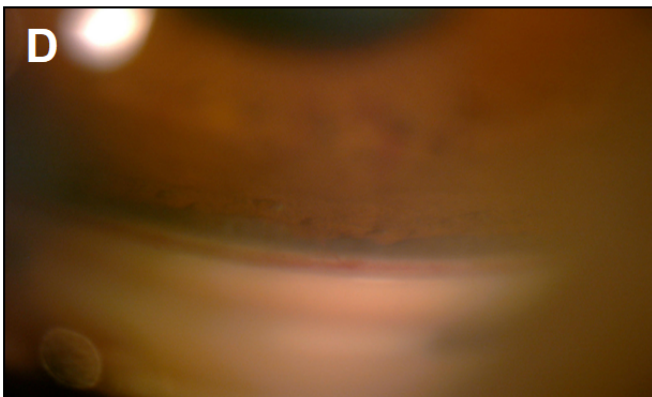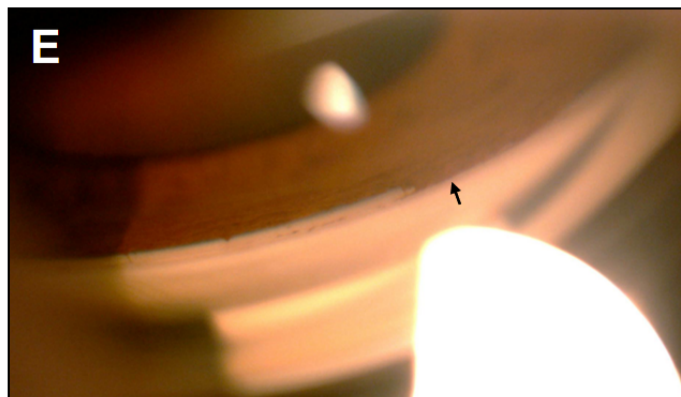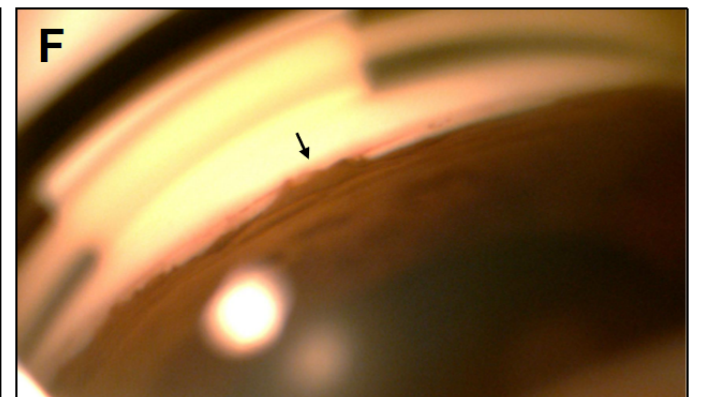

Supplement: 12886_2024_3798_MOESM4_ESM.pdf [file 12886_2024_3798_MOESM4_ESM.pdf]

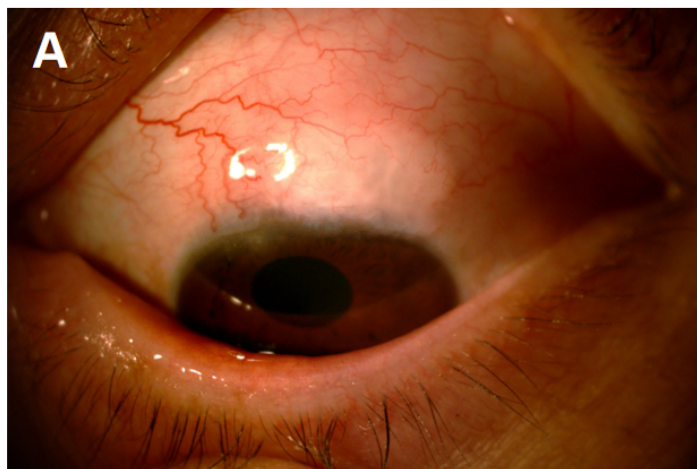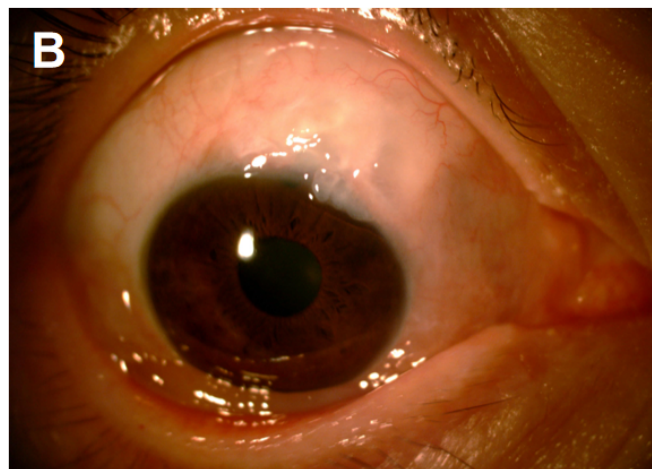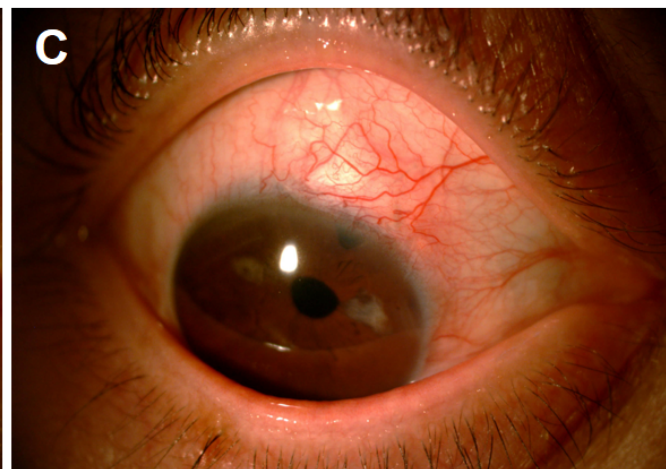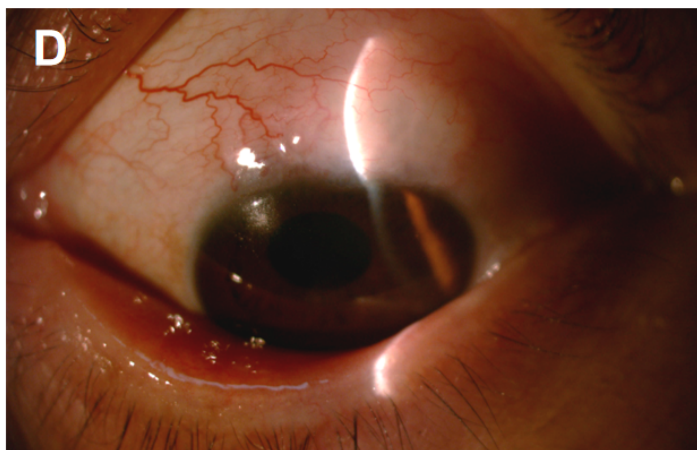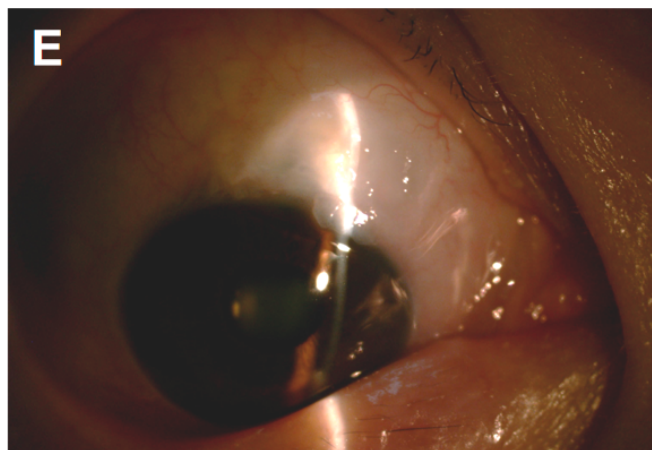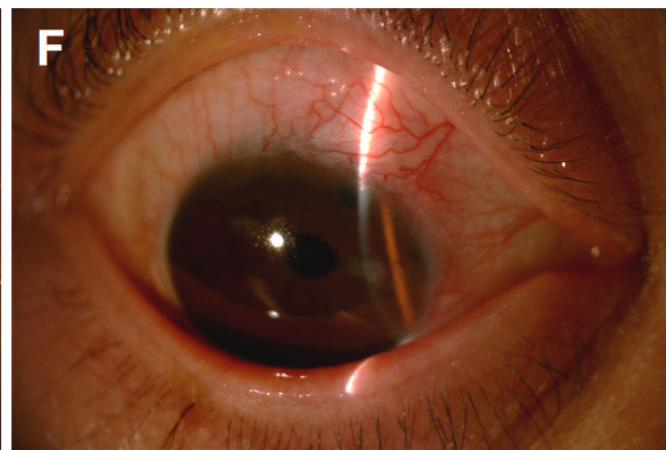

Supplement: 12886_2024_3798_MOESM5_ESM.pdf [file 12886_2024_3798_MOESM5_ESM.pdf]
